# Supplementary material for: The European 2015 drought from a climatological perspective
Source: Copernicus journal article supplement (doi:10.5194/hess-21-1397-2017), 2017-03-08
Supplement: Supplementary file 1 [file hess-21-1397-2017-supplement.pdf]

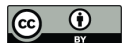

## *Supplement of*

# **The European 2015 drought from a climatological perspective**

**Monica Ionita et al.**

*Correspondence to:* Monica Ionita (monica.ionita@awi.de)

The copyright of individual parts of the supplement might differ from the CC-BY 3.0 licence.

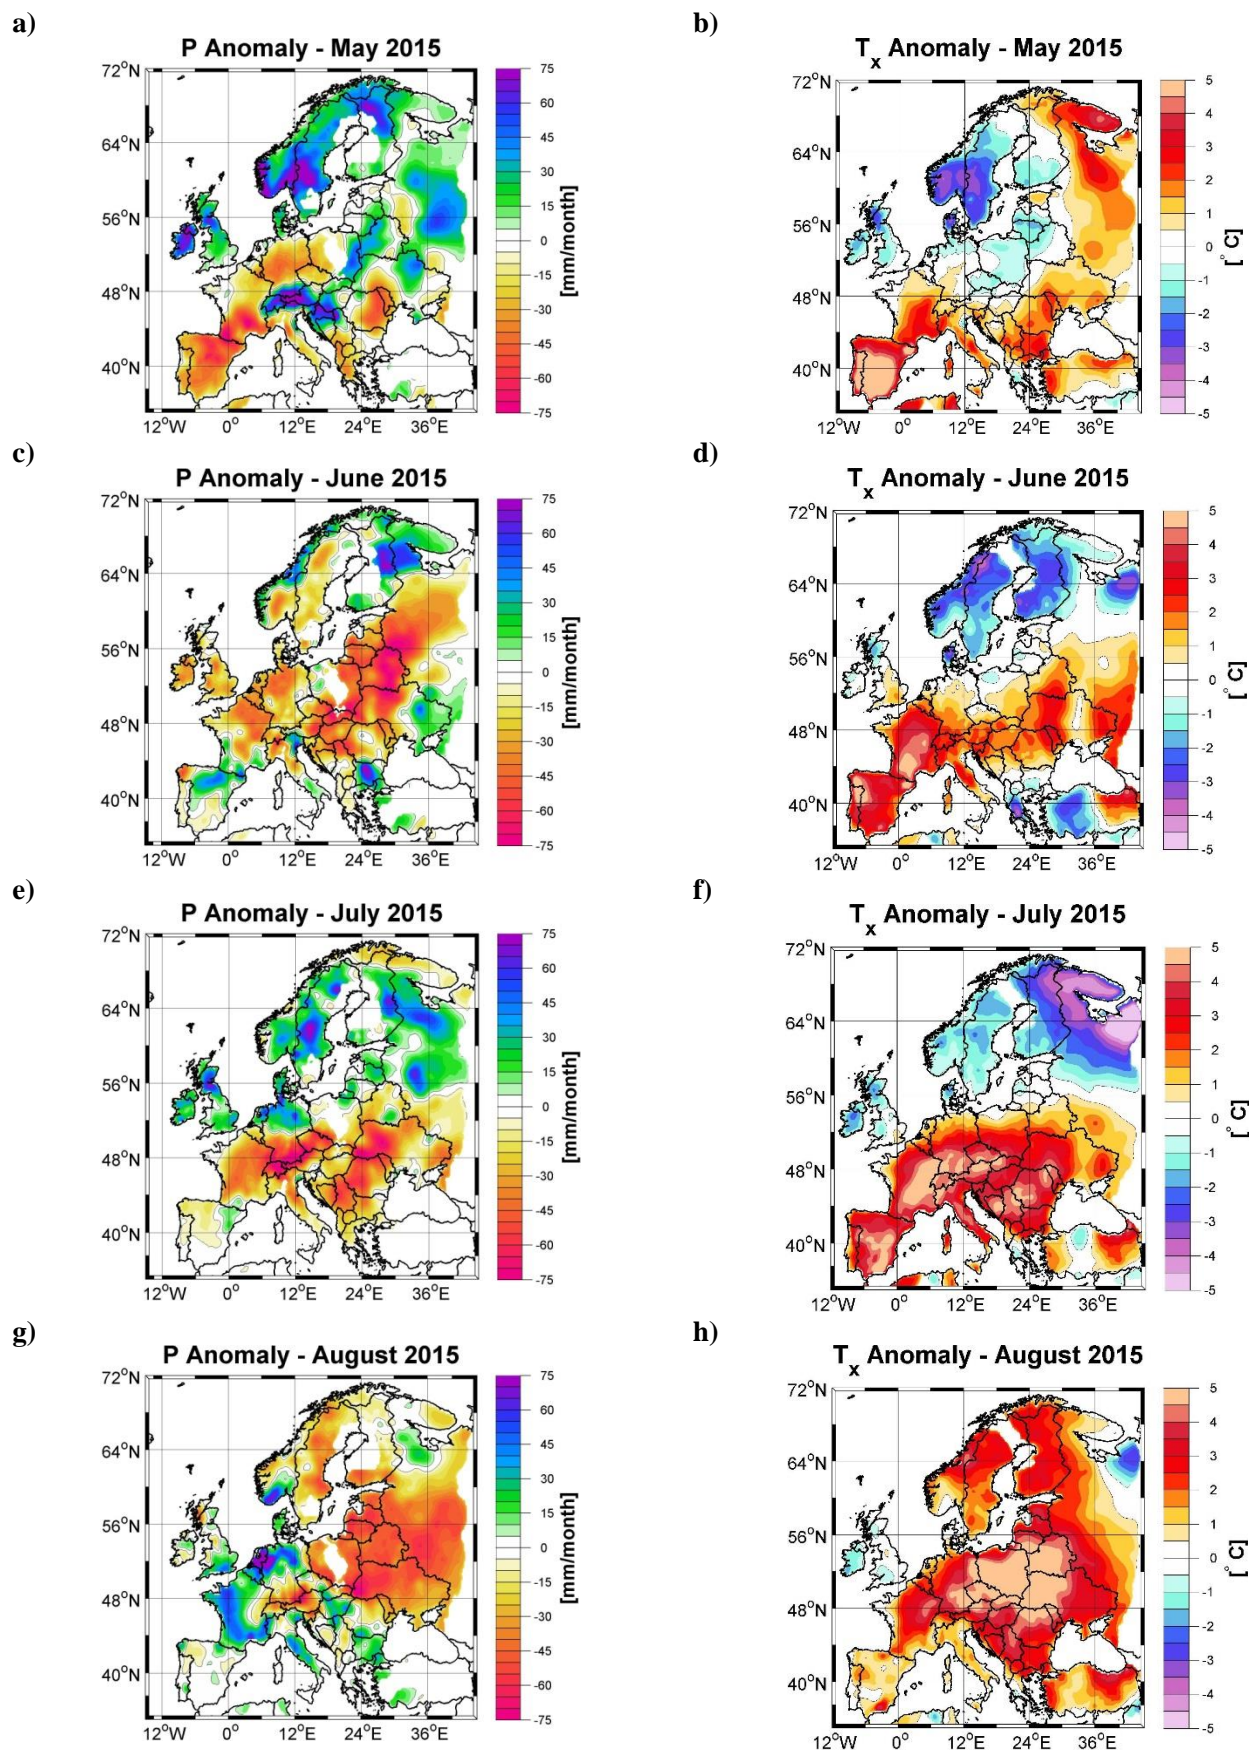

**Figure S1.** Monthly P anomalies (left column) and T<sub>x</sub> anomalies (right column): a) and b) May 2015; c) and d) June 2015; e) and f) July 2015 and g) and h) August 2015. The anomalies are computed relative to the period 1971 – 2000.



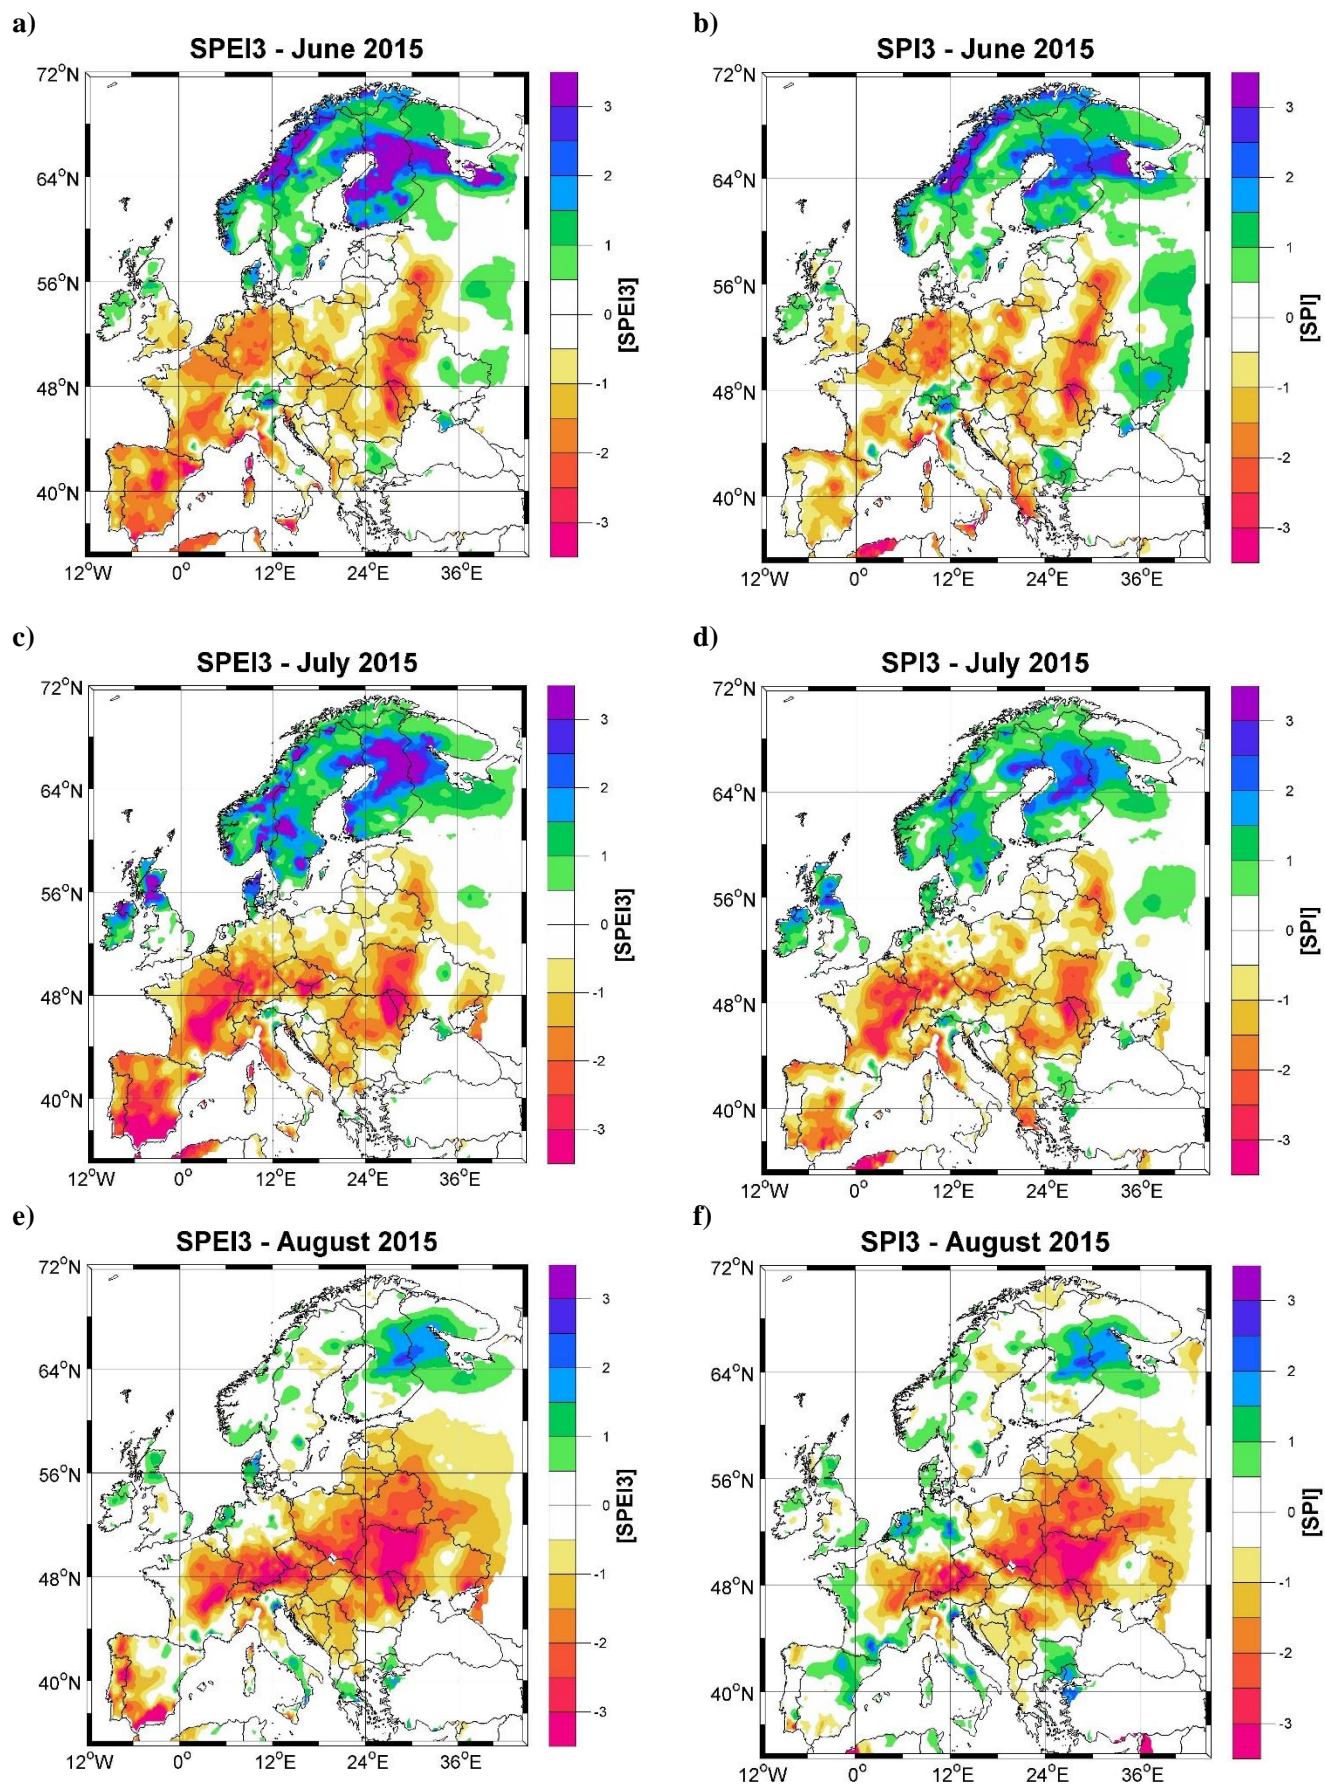

**Figure S2.** a) SPEI3 for June 2015; b) SPI3 for June 2015; c) as in a) but for July 2015; d) as in b) but for July 2015; e) as in a) but for August 2015 and f) as in b) but for August 2015. Reference period 1971-2000.

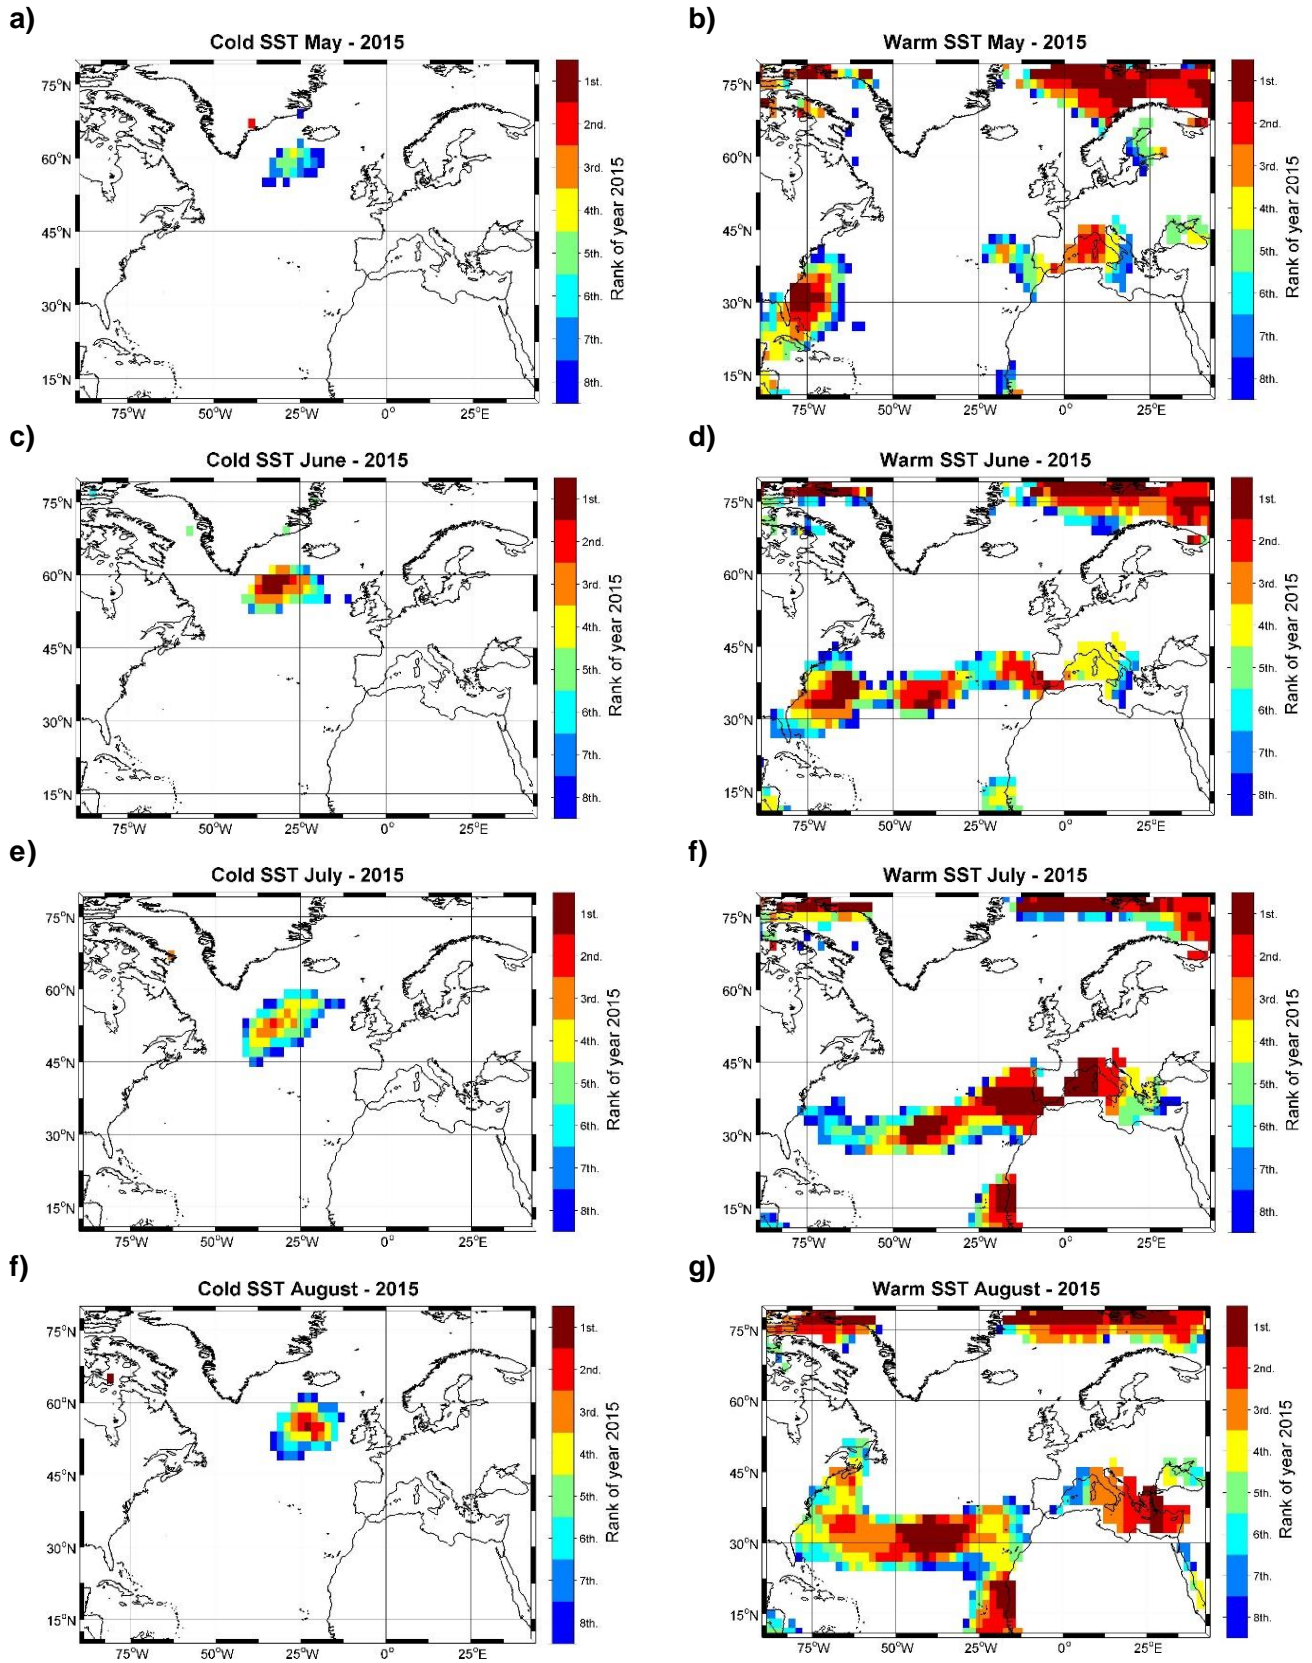

**Figure S3.** Top eight ranking of 2015 monthly cold SSTs (left column) and 2015 monthly warm SSTs (right column): a) May cold SST; b) May warm SST; c) June cold SST; d) June warm SST; e) July cold SST; f) July warm SST; g) August cold SST and h) August warm SST. 1 means the coldest (left column) and warmest (rights column) month since 1950, 2 signifies the second driest, and all ranks greater than 8 are shown in white. Analyzed period: 1854 – 2015.



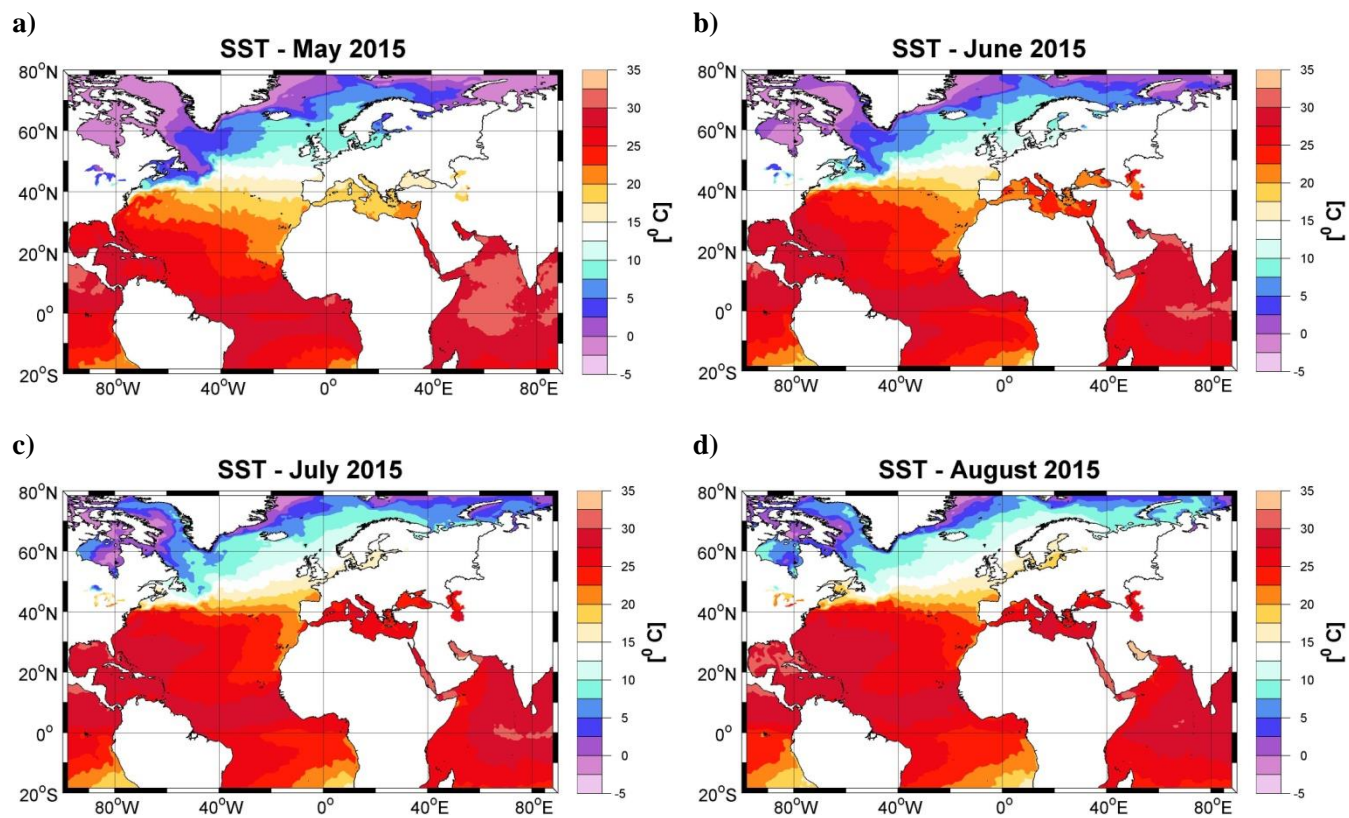

**Figure S4.** a) May 2015 mean SST; b) as in a) but for June 2015; c) in a) but for July 2015 and d) as in a) but for August 2015.

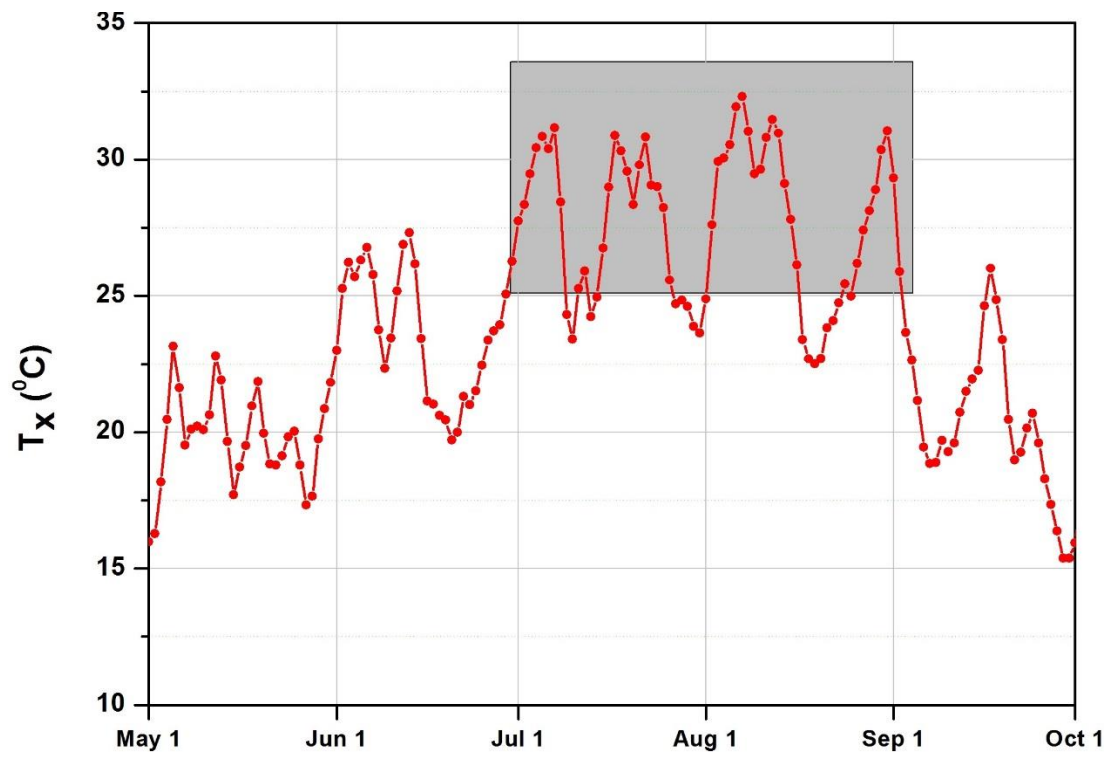

**Figure S5.** Daily evolution of  $T_x$  over the period 1st of May 2015 – 30 September 2015 averaged over the region:  $0 - 30^{\circ}\text{E}$ ,  $40 - 55^{\circ}\text{N}$ . The grey box indicates periods when  $T_x > 25^{\circ}\text{C}$ .



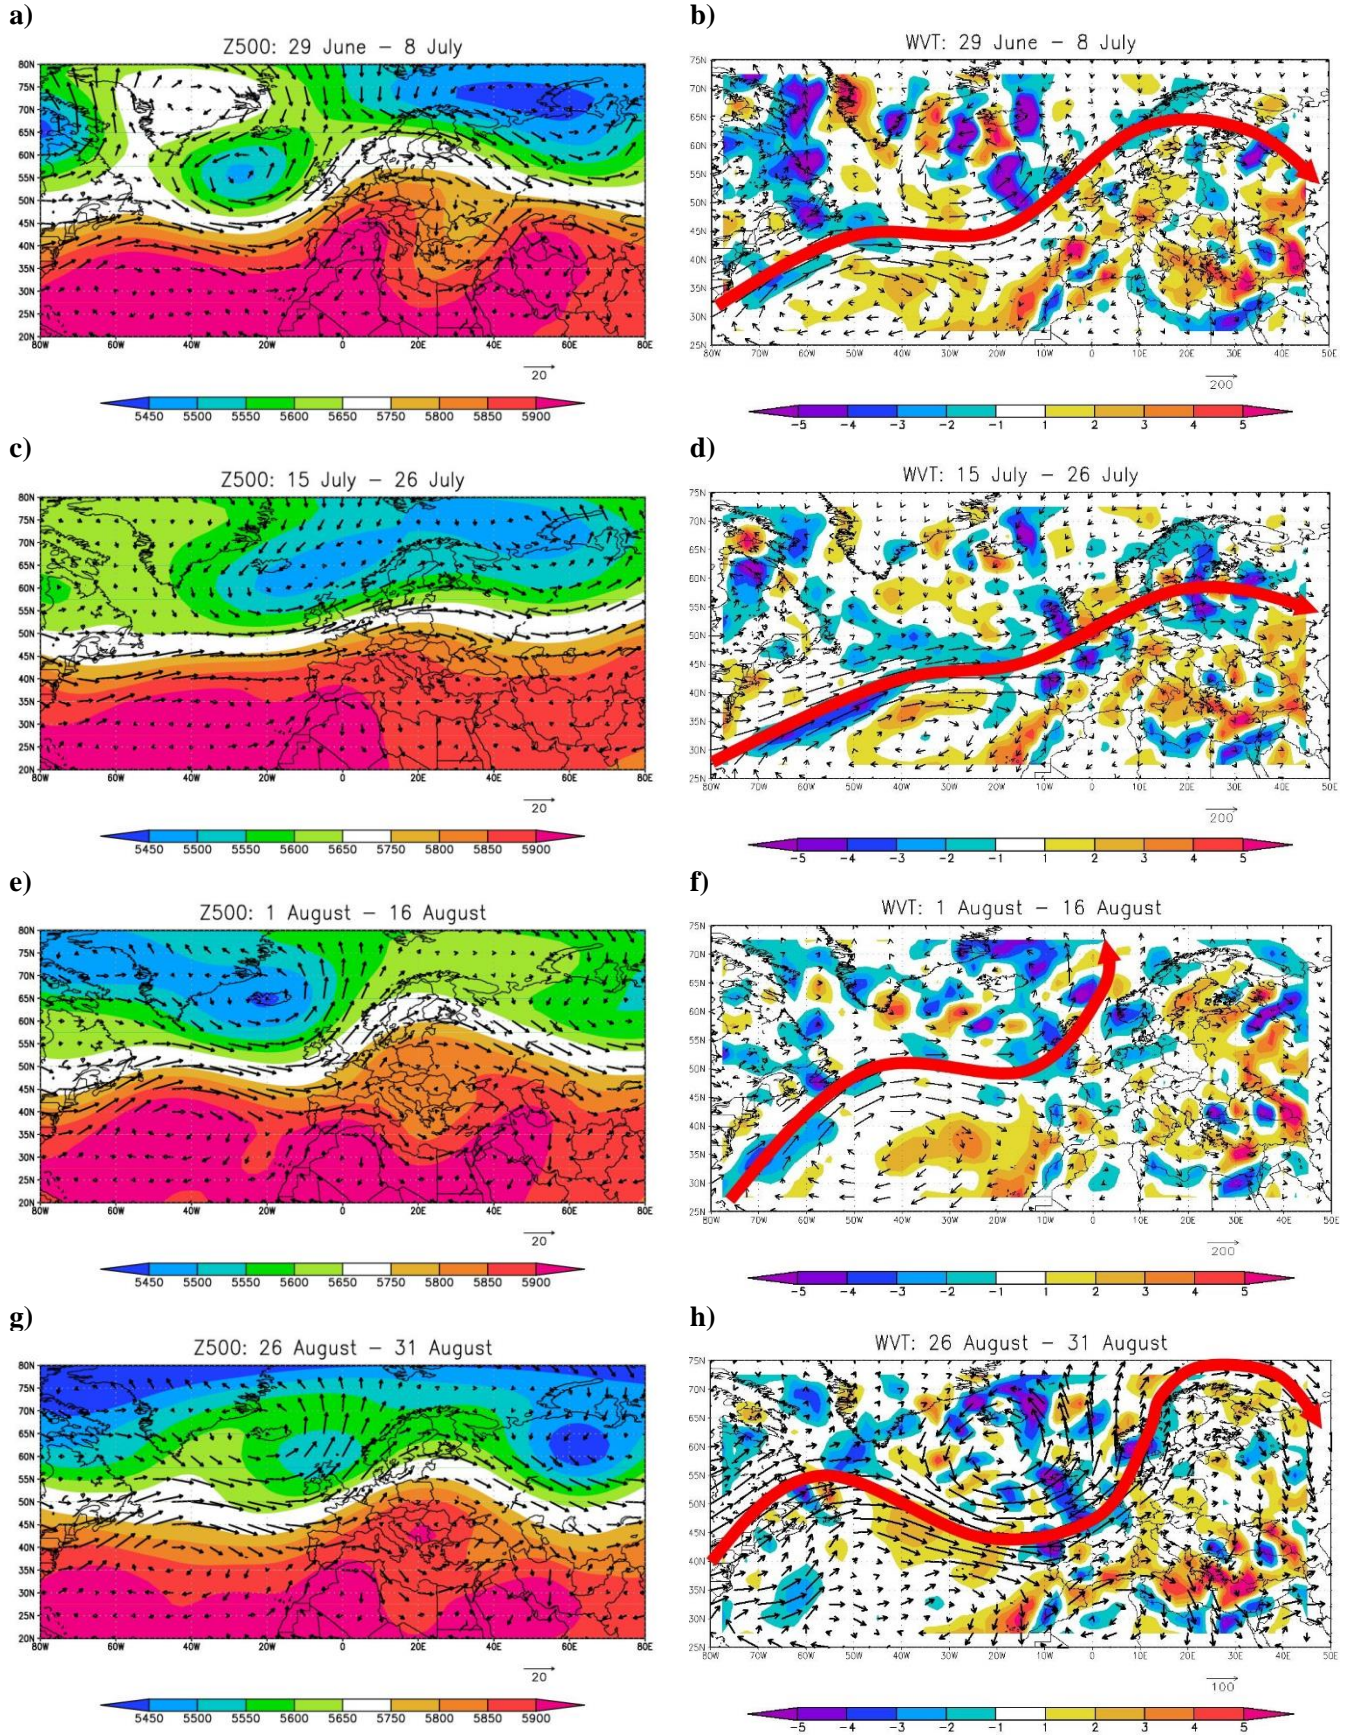

**Figure S6.** Mean daily Z500 (left column) and WVT (right column) averaged over: a) and b) 29 June – 8 July; c) and d) 15 July – 26 July; e) and f) 1 August – 16 August and g) and h) 26 August – 31 August. Units: Z500 (mb) and WVT (kg m/s).



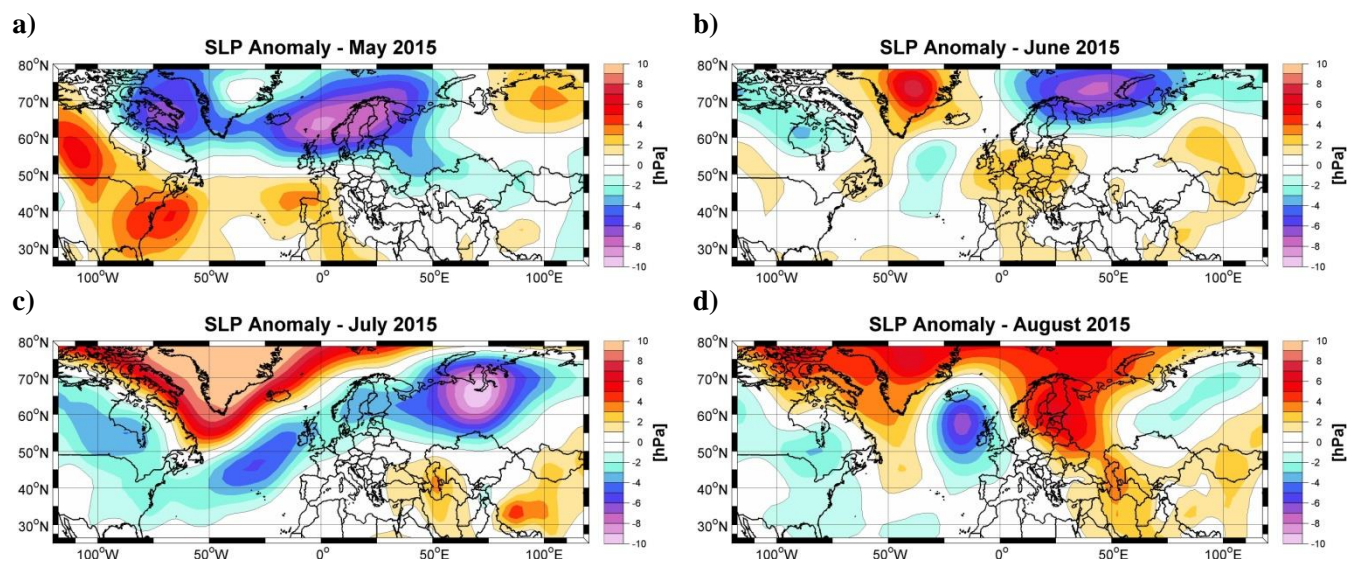

**Figure S7.** a) SLP anomalies for May 2015; b) an is a) but for June 2015; c) as in a) but for July 2015; d) as in a) but for August 2015. The anomalies are computed relative to the period 1971 – 2000.



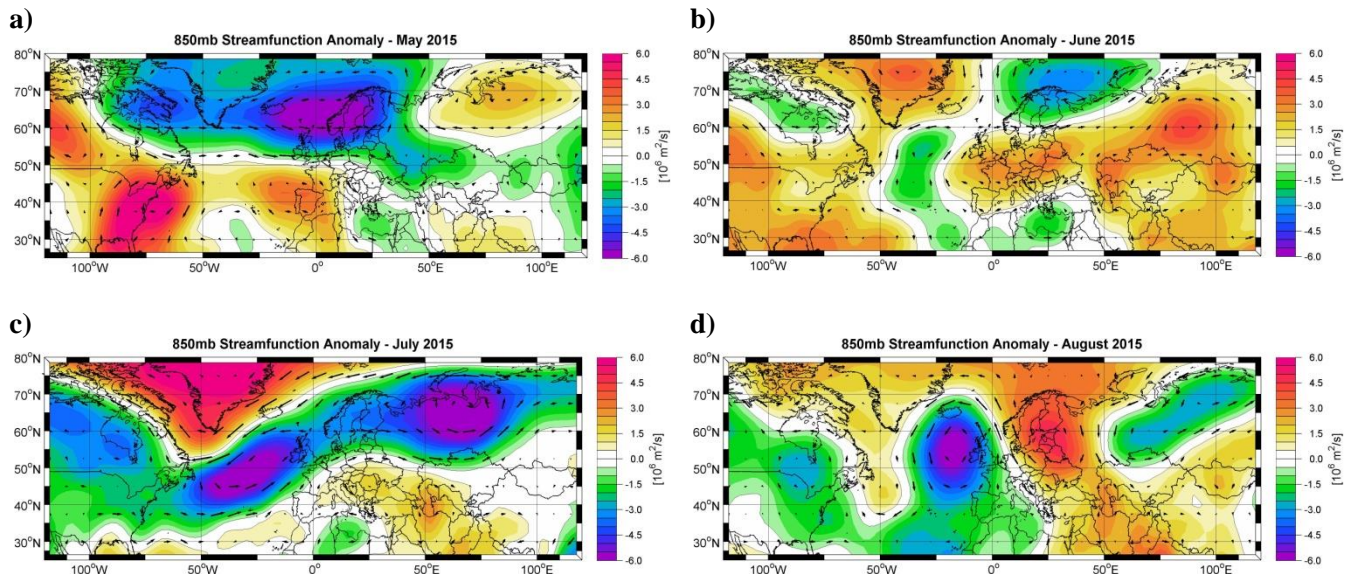

**Figure S8.** a) 850-hPa streamfunction anomalies for May 2015; b) as in a) but for June 2015; c) as in a) but for July 2015; d) as in a) but for August 2015. The anomalies are computed relative to the period 1971 – 2000.

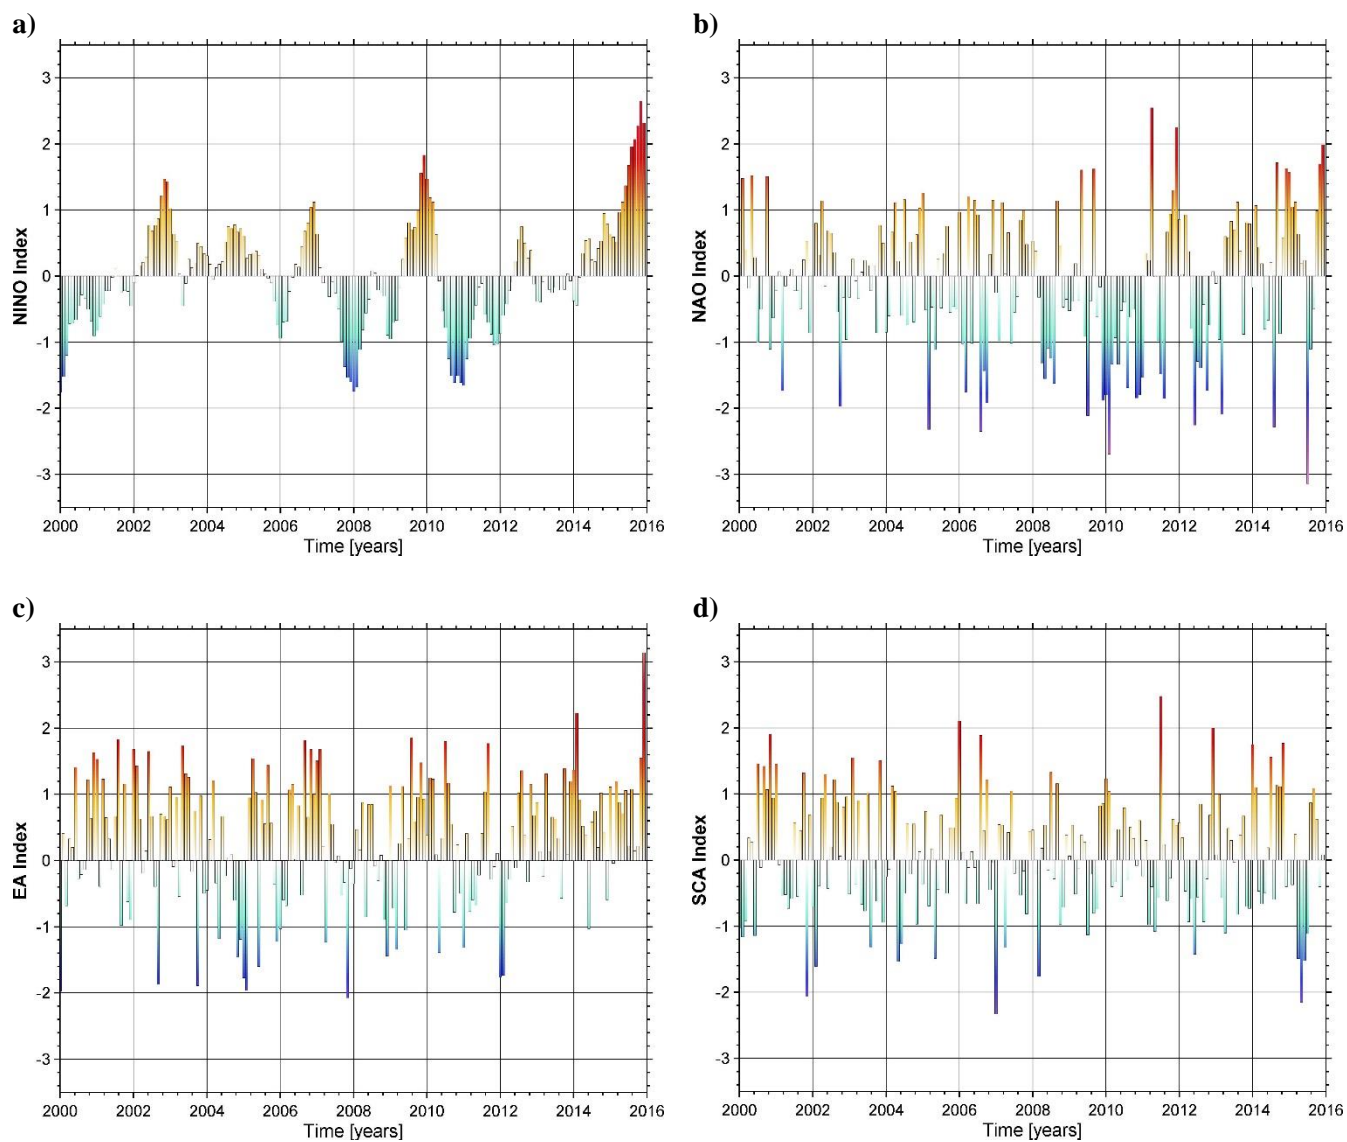

**Figure S9.** Monthly evolution of the teleconnection indices over the period 2006 - 2016: a) Niño 3.4 index; b) NAO index; c) EA index and d) SCA index.



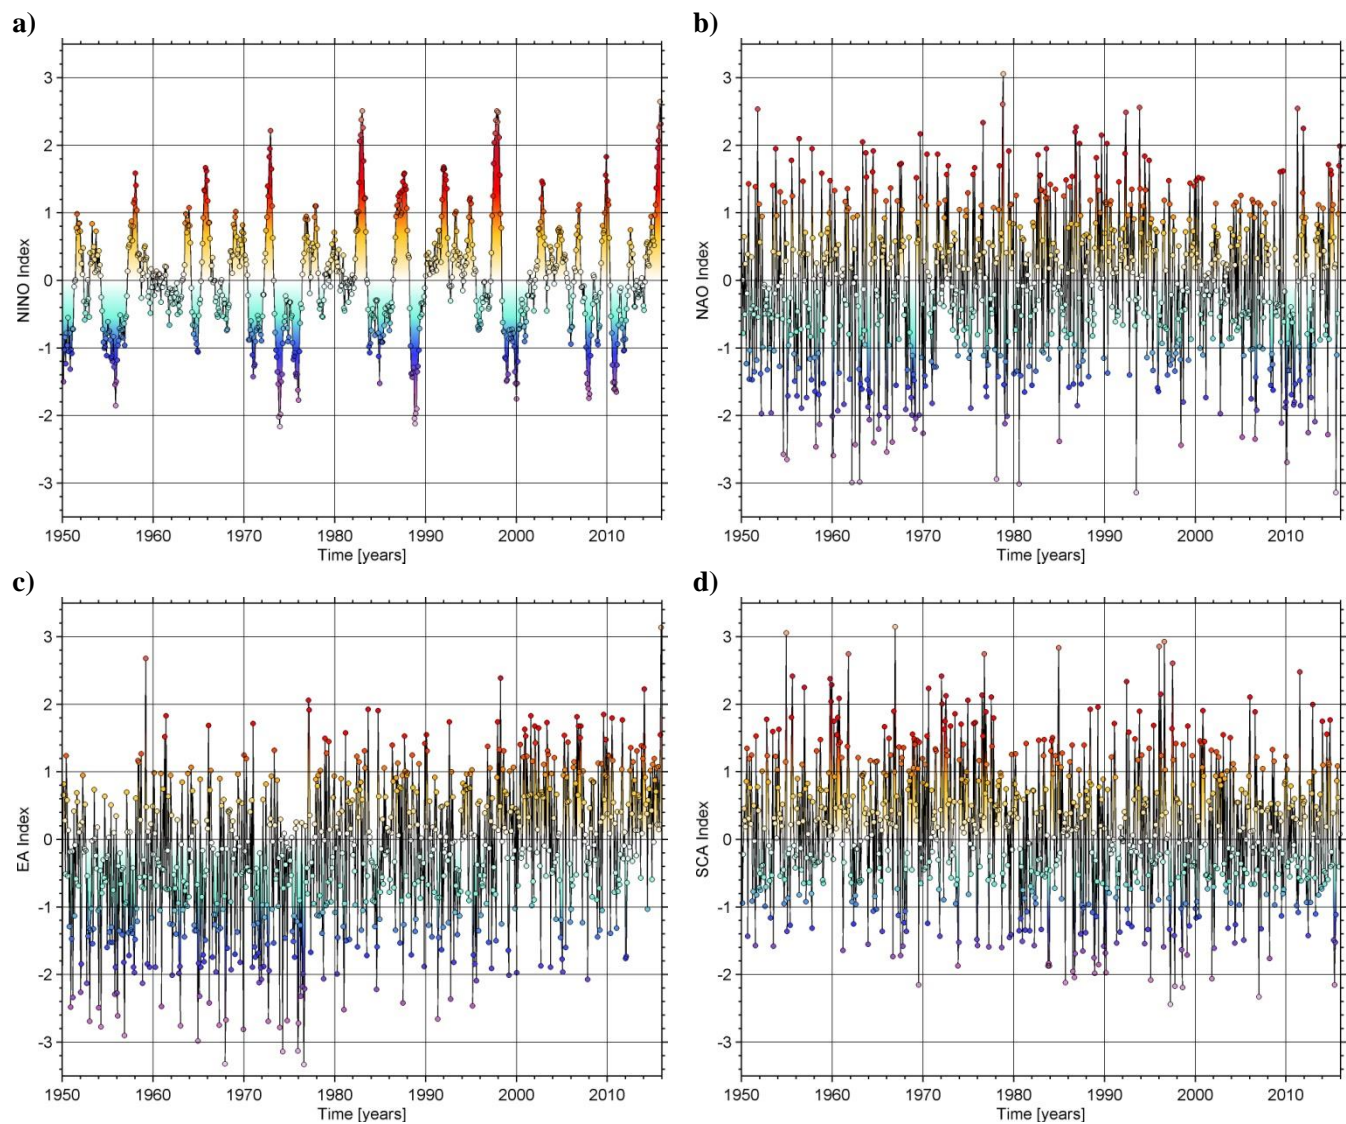

**Figure S10.** As in Figure 8, but for the period 1950 – 2015.

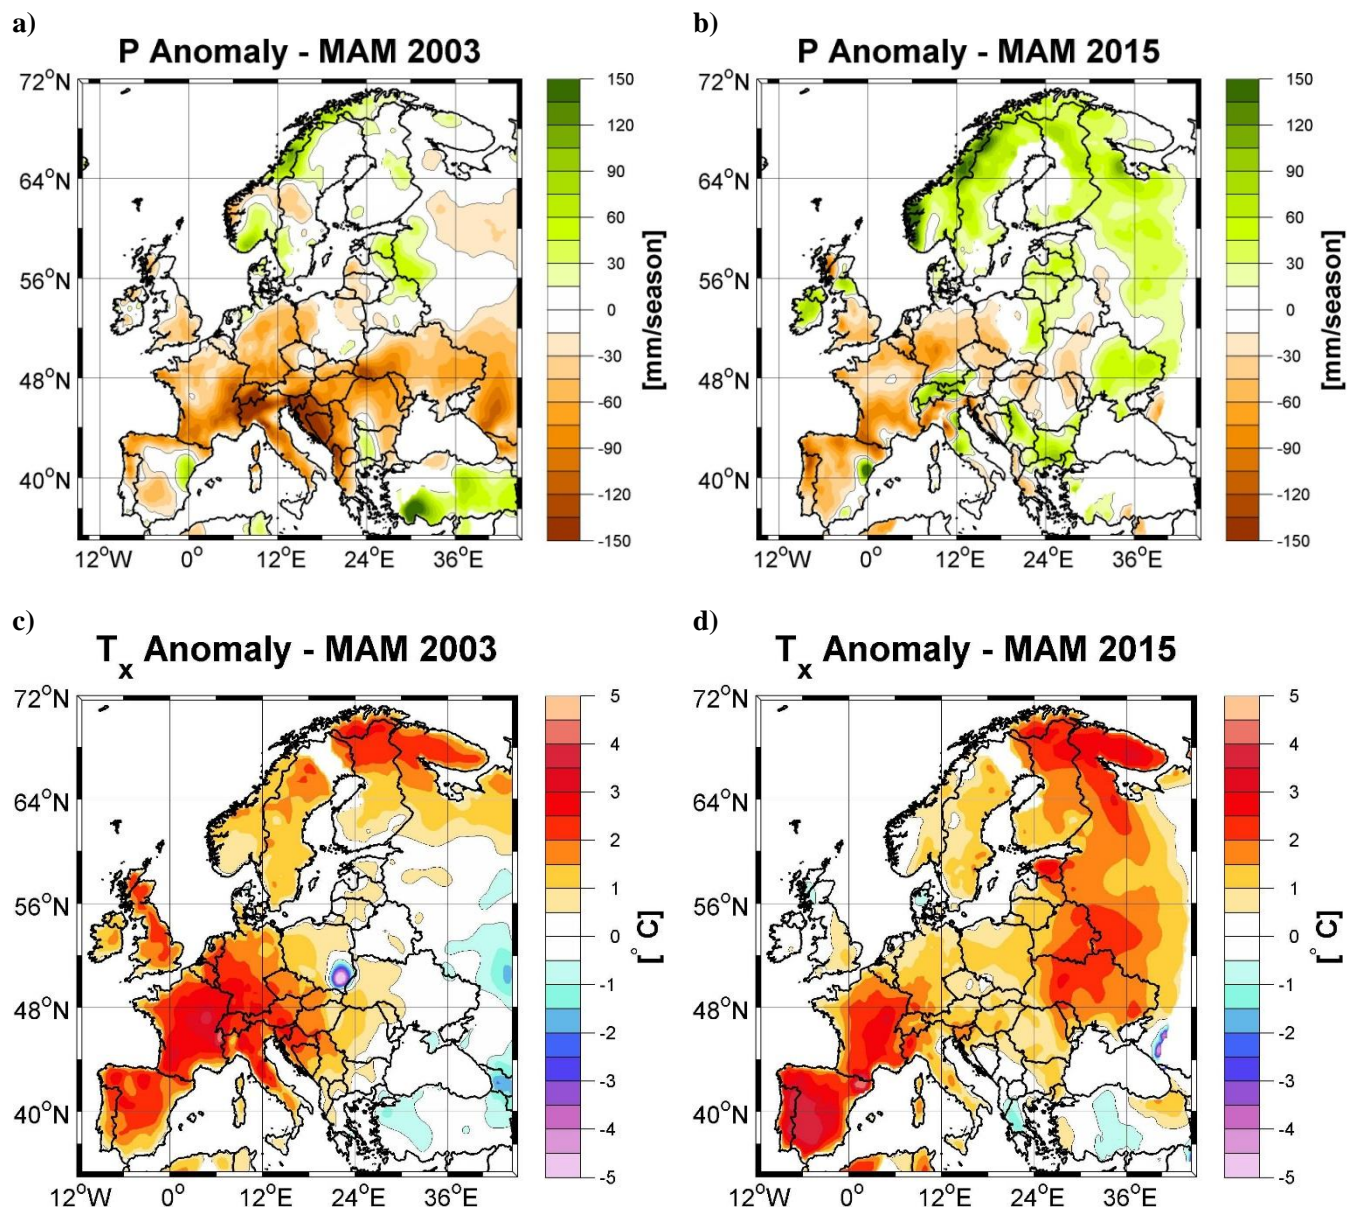

**Figure S11.** a) Spring (MAM) 2003 P anomalies; b) as in a) but for spring 2015; c) Spring 2003 T<sub>x</sub> anomalies; d) as in c) but for spring 2015. The anomalies are computed relative to the period 1971 – 2000.



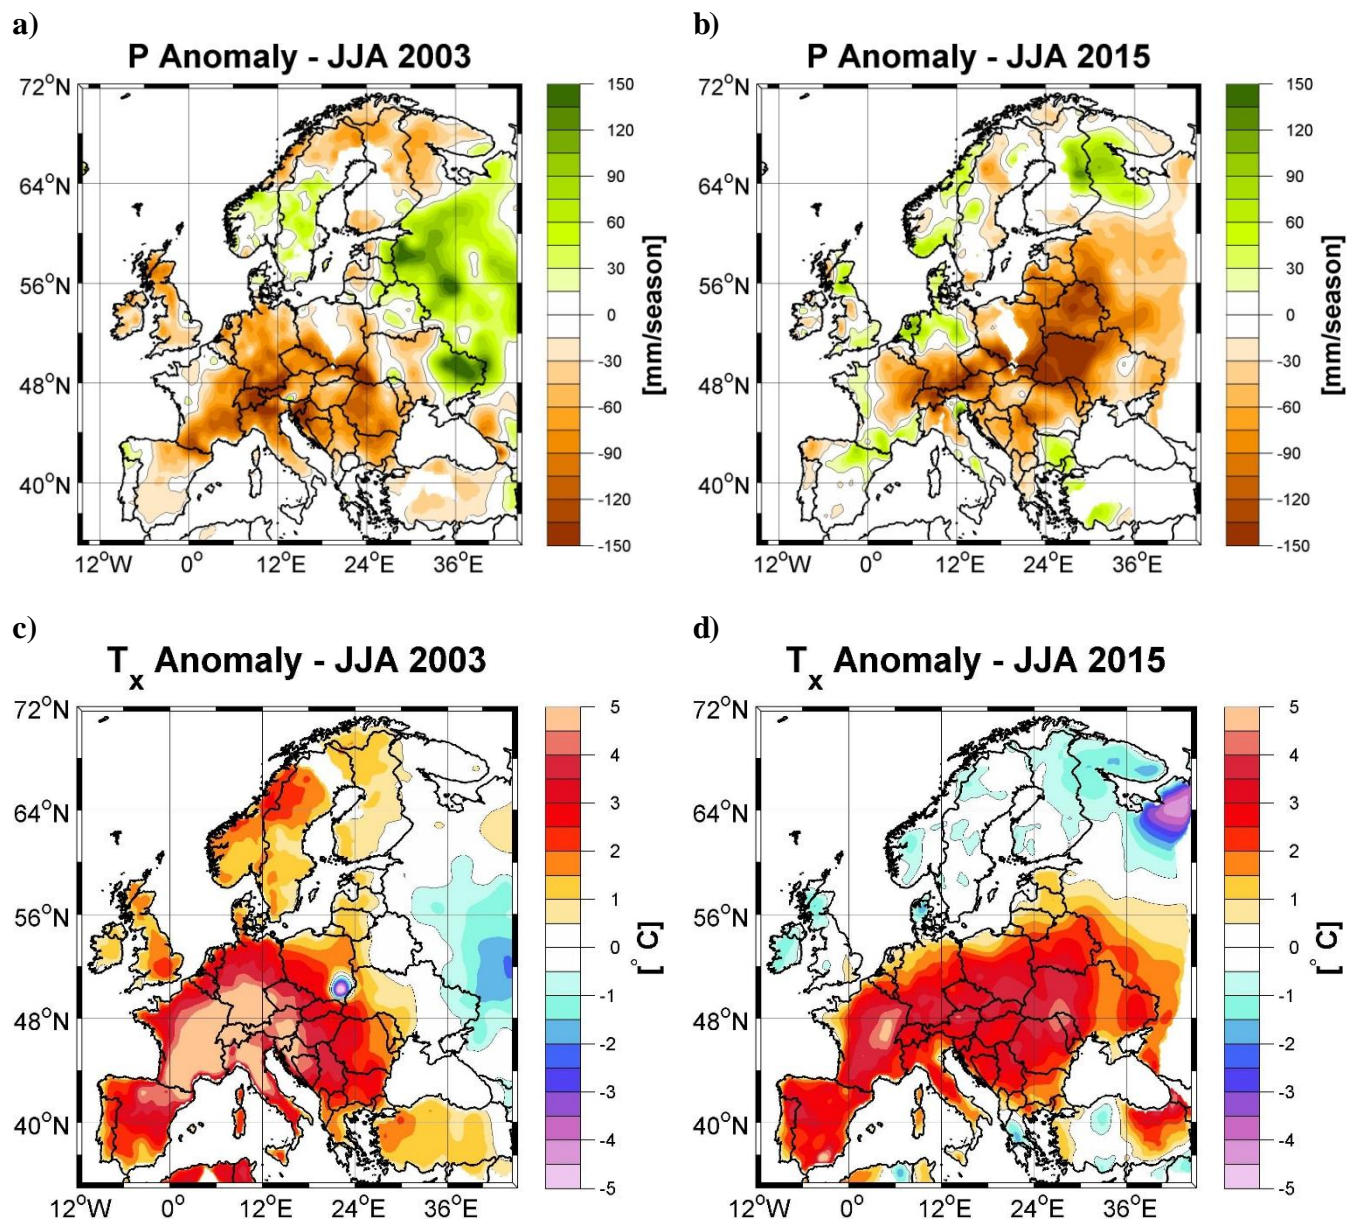

**Figure S12.** a) Summer (JJA) 2003 P anomalies; b) as in a) but for summer 2015; c) Summer 2003 T<sub>x</sub> anomalies; d) as in c) but for summer 2015. The anomalies are computed relative to the period 1971 – 2000.

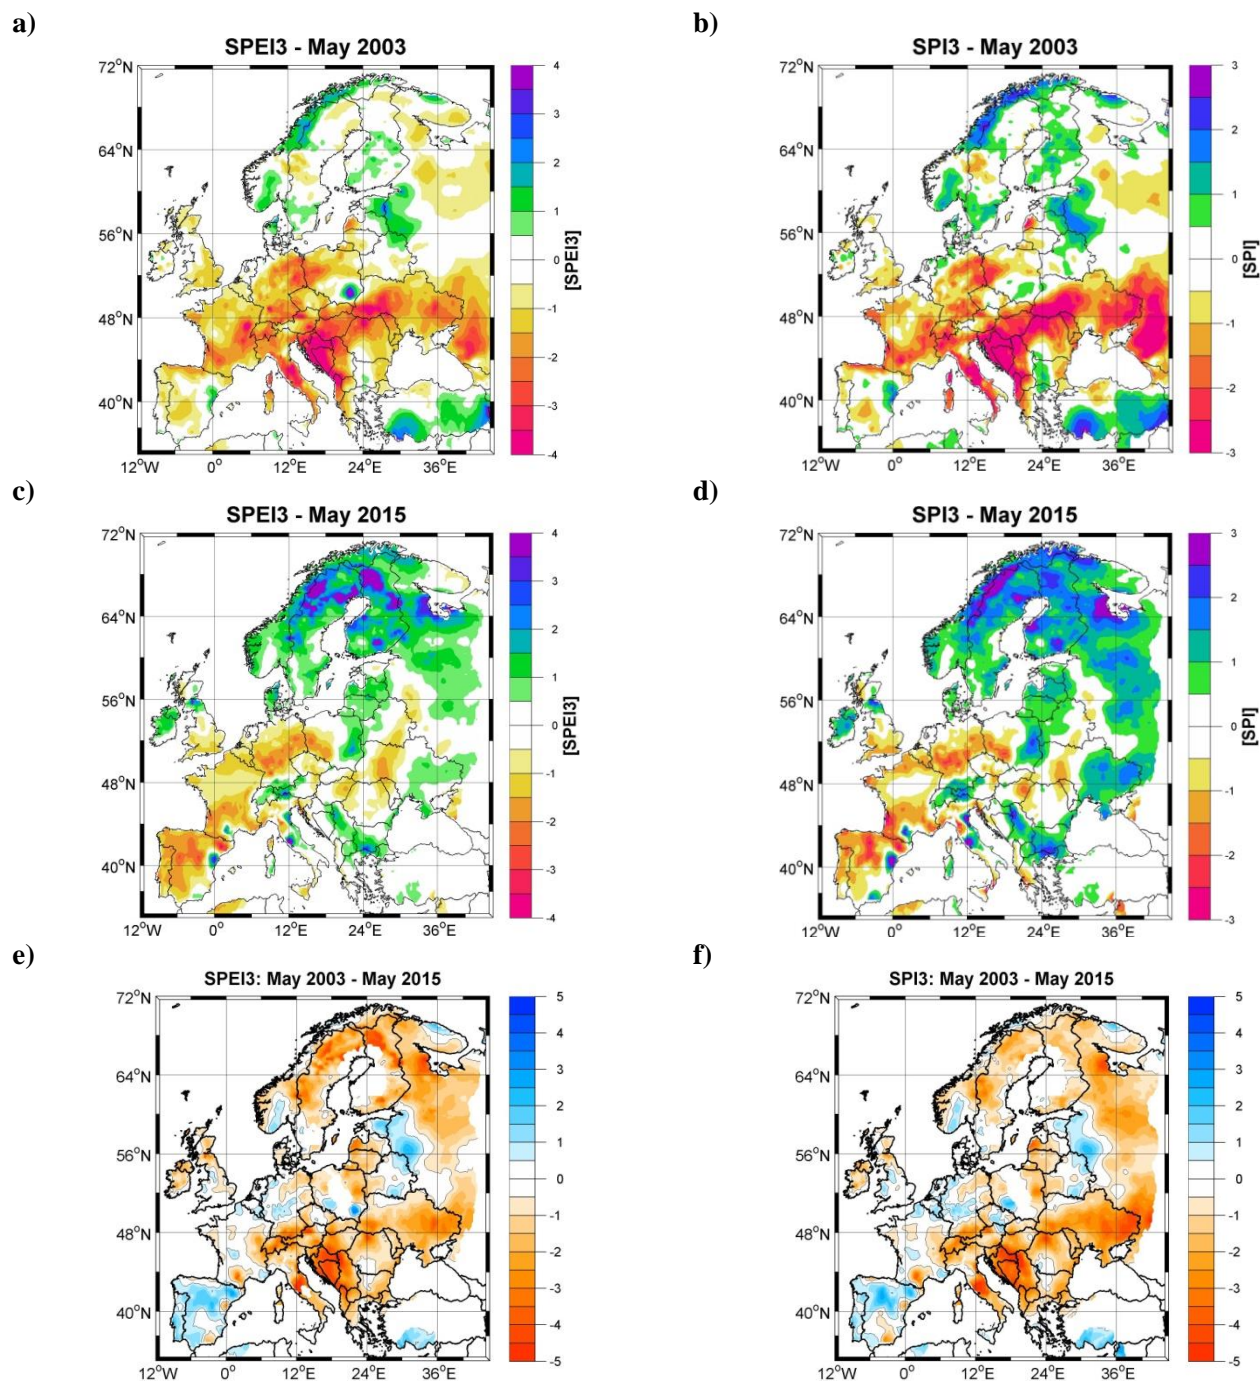

**Figure S13.** a) May SPEI3 2003; b) as in a) but for May 2015; c) May 2003 SPI3; d) as in c) but for May 2015; e) The difference between May 2003 SPEI3 and May 2015 SPEI3; f) as in e) but for SPI3.



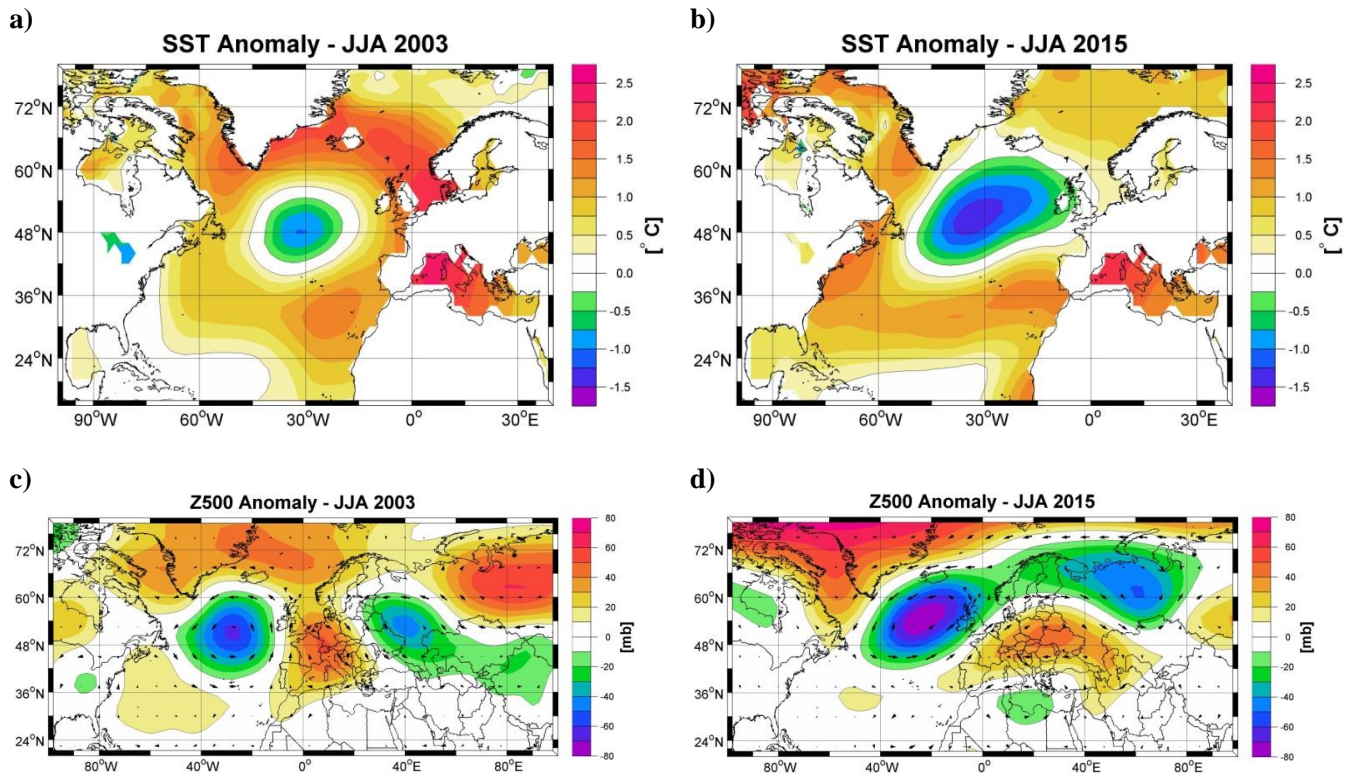

**Figure S14.** a) Summer 2003 SST anomalies; b) as in a) but for summer 2015; c) Summer 2003 Z500 anomalies and d) as in c) but for summer 2015. The anomalies are computed relative to the period 1971 – 2000.

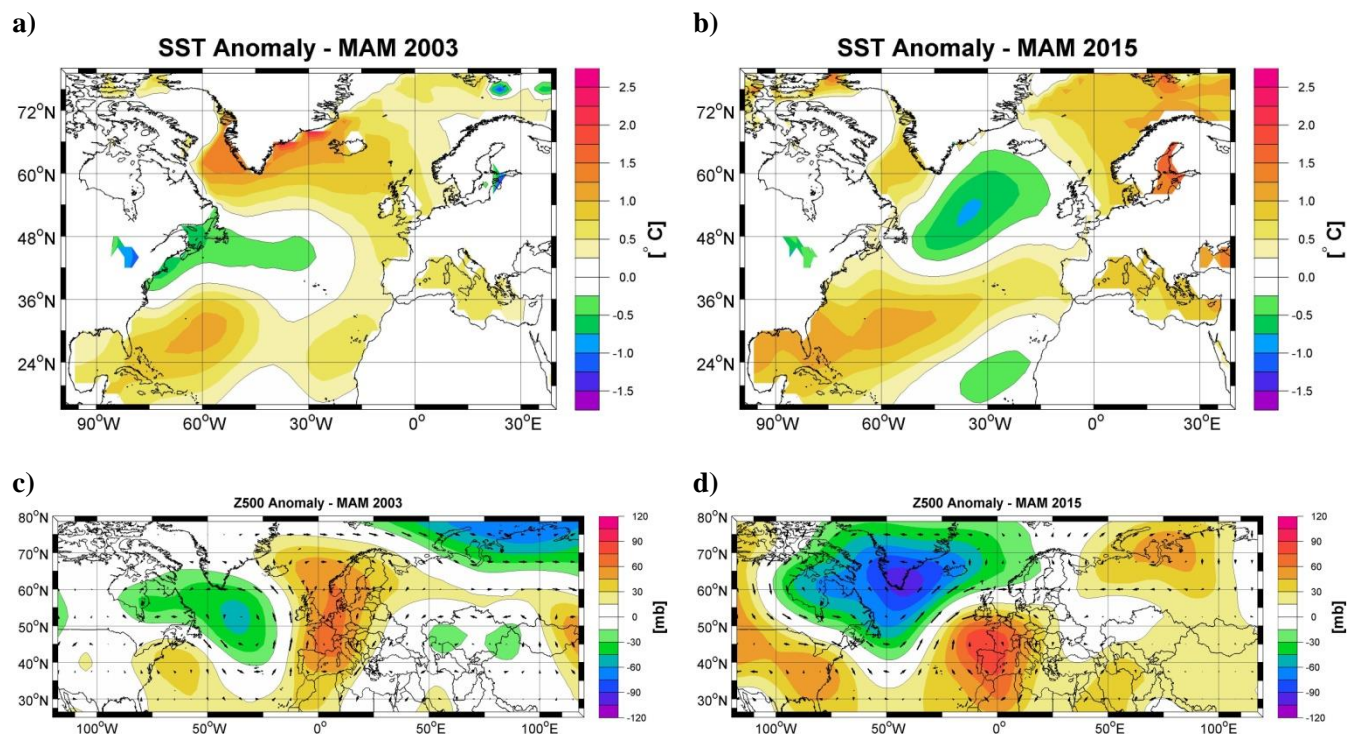

**Figure S15.** a) Spring 2003 SST anomalies; b) as in a) but for spring 2015; c) Spring 2003 Z500 anomalies; d) as in c) but for spring 2015. The anomalies are computed relative to the period 1971 – 2000.



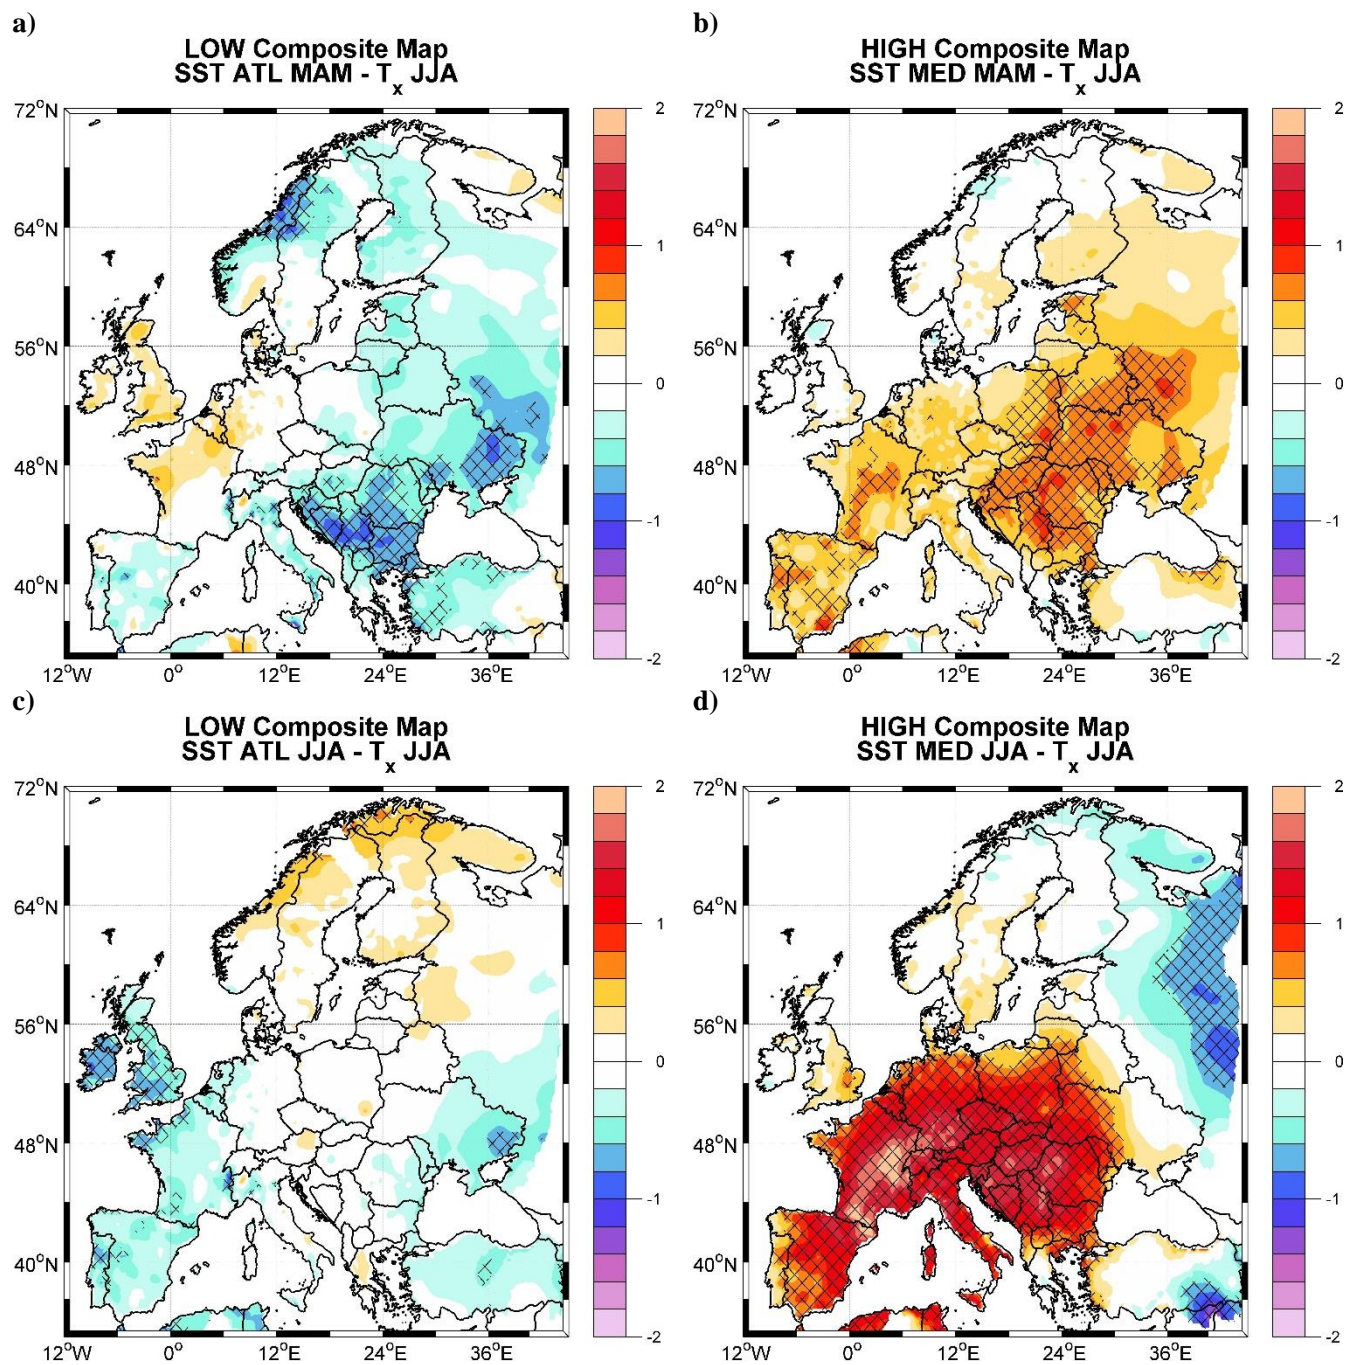

**Figure S16.** As in Figure 15, but for JJA  $T_x$  field. Analyzed period: 1950 – 2015.
